# Supplementary material
Source: PubMed Central journal article supplement (PMC4751839)
Supplement: AEM.03765-15_zam999116943so1.pdf [file AEM.03765-15_zam999116943so1.pdf]

## SUPPLEMENTARY MATERAILS

1  
2  
3  
4  
5  
6  
7  
8  
9

**Supplementary Table S1.** Target, primer sequences and amplification conditions for qPCR assays used in this study

| Assays                         | Target               | Primer or probe sequence (5'-3') <sup>a</sup>                                                                           | Amplification conditions                                                  | References |
|--------------------------------|----------------------|-------------------------------------------------------------------------------------------------------------------------|---------------------------------------------------------------------------|------------|
| <i>E. coli</i> (EC)            | 23S rRNA             | F: GGT AGA GCA CTG TTT TGG CA<br>R: TGT CTC CCG TGA TAA CTT TCTC<br>P: FAM-TCA TCC CGA CTT ACC AAC CCG-TAMRA            | 10 min at 95 °C, 40 cycles of 15 s at 95 °C, 60 s at 60 °C                | (2)        |
| <i>Enterococcus</i> spp. (ENT) | 23S rRNA             | F: AGA AAT TCC AAA CGA ACT TTG<br>R: CAG TGC TCT ACC TCC ATC ATT<br>P: FAM-TGG TTC TCT CCG AAA TAG CTT TAG GGC TA-TAMRA | 10 min at 95 °C, 40 cycles of 15 s at 95 °C, 2 min at 60 °C               | (3)        |
| <i>Bacteroides</i> HF183       | 16S rRNA             | F: ATC ATG AGT TCA CAT GTC CCG<br>R: TAC CCC GCC TAC TAT CTA ATG                                                        | 10 min at 95 °C, 40 cycles of 30 s at 95 °C, 60 s at 53 °C, 60 s at 60 °C | (1, 6)     |
| Human adenoviruses (HAdVs)     | Hexon gene           | F: GCC ACG GTG GGG TTT CTA AAC TT<br>R: GCC CCA GTG GTC TTA CAT GCA CAT C<br>P: TGC ACC AGA CCC GGG CTC AGG TAC TCC GA  | 10 min at 95°C, 40 cycles of 15 s at 95°C, 20 s at 60 °C and 20 S at 95°C | (4)        |
| Human polyomaviruses (HPyVs)   | Homologous T antigen | F: AGT CTT TAG GGT CTT CTA CCT TT<br>R: GGT GCC AAC CTA TGG AAC AG<br>P: FAM-TCA TCA CTG GCA AAC AT-MGBNFQ              | 10 min at 95°C, 40 cycles of 15 s at 95°C, 15 s at 55°C and 60 s 60°C     | (5)        |

<sup>a</sup>F: forward primer; R: reverse primer; P: probe; FAM, 6-carboxyfluorescein; TAMRA, 6-carboxytetramethylrhodamine

10  
11  
12  
13  
14  
15  
16  
17  
18  
19  
20  
21  
22  
23  
24  
25  
26  
27  
28  
29  
30  
31  
32  
33  
34  
35  
36  
37  
38  
39

**Supplementary Table S2:** Performance characteristics (range) of *Escherichia coli* (EC), *Enterococcus* spp. (ENT), *Bacteroides* HF183 (HF183), human adenoviruses (HAdVs) and human polyomaviruses (HPyVs) qPCR assays

| qPCR assays | Slope            | Amplification efficiencies ( <i>E</i> ) | Correlation coefficient ( <i>r</i> <sup>2</sup> ) |
|-------------|------------------|-----------------------------------------|---------------------------------------------------|
| EC          | -3.362 to -3.414 | 96.3% to 98.6%                          | 0.997 to 1.000                                    |
| ENT         | -3.231 to -3.393 | 97.1% to 104%                           | 0.993 to 0.999                                    |
| HF183       | -3.256 to -3.279 | 101% to 103%                            | 0.999 to 1.000                                    |
| HAdVs       | -3.240 to -3.435 | 95.5% to 103%                           | 0.993 to 0.997                                    |
| HPyVs       | -3.434 to -3.461 | 94.5% to 94.9%                          | 0.995 to 0.988                                    |

*E*: Amplification efficiency =  $10^{(1/-slope)/2}$ .  
*r*<sup>2</sup>: denotes the correlation coefficient of determination representing the proportion of variability accounted for by the linear model.

40  
41  
42  
43  
44  
45  
46  
47  
48  
49  
50  
51  
52  
53  
54  
55  
56  
57  
58  
59  
60  
61

**Supplementary Table S3:** *P* values of Kruskal-Wallis one-way ANOVA with Dunn's multiple comparison post-test among fecal indicator bacteria (FIB) and human fecal markers (HFMs) within each wastewater treatment plant (WWTP)

|                              | EC       | ENT      | HF183    | HAdVs    |
|------------------------------|----------|----------|----------|----------|
| WWTP A                       |          |          |          |          |
| ENT                          | < 0.0001 |          |          |          |
| HF183                        | 0.0002   | 0.1959   |          |          |
| HAdVs                        | < 0.0001 | < 0.0001 | < 0.0001 |          |
| HPyVs                        | < 0.0001 | < 0.0001 | < 0.0001 | 0.0060   |
| WWTP B                       |          |          |          |          |
| ENT                          | < 0.0001 |          |          |          |
| HF183                        | 0.5438   | < 0.0001 |          |          |
| HAdVs                        | < 0.0001 | < 0.0001 | < 0.0001 |          |
| HPyVs                        | < 0.0001 | < 0.0001 | < 0.0001 | > 0.9999 |
| WWTP C                       |          |          |          |          |
| ENT                          | 0.0090   |          |          |          |
| HF183                        | > 0.9999 | 0.2335   |          |          |
| HAdVs                        | < 0.0001 | < 0.0001 | < 0.0001 |          |
| HPyVs                        | < 0.0001 | < 0.0001 | < 0.0001 | > 0.9999 |
| Pooled datasets <sup>a</sup> |          |          |          |          |
| ENT                          | < 0.0001 |          |          |          |
| HF183                        | 0.1629   | < 0.0001 |          |          |
| HAdVs                        | < 0.0001 | < 0.0001 | < 0.0001 |          |
| HPyVs                        | < 0.0001 | < 0.0001 | < 0.0001 | 0.1269   |

EC: *E. coli*  
 ENT: *Enterococcus* spp.  
 HAdVs: Human adenoviruses  
 HPyVs: Human polyomaviruses  
<sup>a</sup>:data from three WWTPs were pooled.

62  
63  
64  
65  
66  
67  
68  
69  
70  
71  
72  
73  
74  
75  
76  
77  
78  
79  
80  
81  
82  
83

**Supplementary Table S4:** Spearman correlation ( $r$ ) matrix among fecal indicator bacteria (FIB) and human fecal markers (HFMs) within each wastewater treatment plant (WWTP).  $P$  values are shown in the brackets.

|                              | EC                     | ENT                    | HF183                  | HAdVs                  |
|------------------------------|------------------------|------------------------|------------------------|------------------------|
| WWTP A                       |                        |                        |                        |                        |
| ENT                          | 0.728 ( $P < 0.0001$ ) |                        |                        |                        |
| HF183                        | 0.696 ( $P < 0.0001$ ) | 0.862 ( $P < 0.0001$ ) |                        |                        |
| HAdVs                        | 0.329 ( $P < 0.001$ )  | 0.468 ( $P < 0.001$ )  | 0.670 ( $P < 0.0001$ ) |                        |
| HPyVs                        | -0.023 ( $P = 0.820$ ) | 0.036 ( $P = 0.722$ )  | 0.329 ( $P < 0.001$ )  | 0.466 ( $P < 0.001$ )  |
| WWTP B                       |                        |                        |                        |                        |
| ENT                          | 0.606 ( $P < 0.0001$ ) |                        |                        |                        |
| HF183                        | 0.950 ( $P < 0.0001$ ) | 0.549 ( $P < 0.0001$ ) |                        |                        |
| HAdVs                        | 0.435 ( $P < 0.001$ )  | 0.885 ( $P < 0.0001$ ) | 0.383 ( $P < 0.001$ )  |                        |
| HPyVs                        | 0.308 ( $P < 0.001$ )  | 0.486 ( $P < 0.0001$ ) | 0.207 ( $P < 0.05$ )   | 0.420 ( $P < 0.0001$ ) |
| WWTP C                       |                        |                        |                        |                        |
| ENT                          | 0.531 ( $P < 0.0001$ ) |                        |                        |                        |
| HF183                        | 0.890 ( $P < 0.0001$ ) | 0.562 ( $P < 0.0001$ ) |                        |                        |
| HAdVs                        | 0.427 ( $P < 0.0001$ ) | 0.235 ( $P < 0.05$ )   | 0.420 ( $P < 0.0001$ ) |                        |
| HPyVs                        | -0.039 ( $P = 0.702$ ) | -0.089 ( $P = 0.379$ ) | 0.048 ( $P = 0.636$ )  | 0.300 ( $P < 0.001$ )  |
| Pooled datasets <sup>a</sup> |                        |                        |                        |                        |
| ENT                          | 0.259 ( $P < 0.001$ )  |                        |                        |                        |
| HF183                        | 0.845 ( $P < 0.0001$ ) | 0.338 ( $P < 0.0001$ ) |                        |                        |
| HAdVs                        | 0.413 ( $P < 0.0001$ ) | 0.515 ( $P < 0.0001$ ) | 0.416 ( $P < 0.0001$ ) |                        |
| HPyVs                        | 0.189 ( $P < 0.05$ )   | 0.185 ( $P < 0.05$ )   | 0.171 ( $P < 0.05$ )   | 0.448 ( $P < 0.0001$ ) |

EC: *E. coli*  
 ENT: *Enterococcus* spp.  
 HAdVs: Human adenoviruses  
 HPyVs: Human polyomaviruses  
<sup>a</sup>:data from three WWTPs were pooled.

84  
85  
86  
87  
88  
89  
90  
91  
92  
93  
94

**Supplementary Table S5:** Concentrations (gene copies per mL) of sewage-associated *Bacteroides* (HF183), human adenoviruses (HAdVs), and human polyomaviruses (HPyVs) in raw wastewater samples collected from three wastewater treatment plants (WWTPs) (A, B and C) in Australia.

| Wastewater treatment plants | Sampling events | HF183              | HAdVs              | HPyVs              |
|-----------------------------|-----------------|--------------------|--------------------|--------------------|
| WWTP A                      | 1               | $1.58 \times 10^6$ | $8.40 \times 10^3$ | $3.80 \times 10^3$ |
|                             | 2               | $1.86 \times 10^6$ | $1.41 \times 10^4$ | $7.46 \times 10^3$ |
|                             | 3               | $1.51 \times 10^6$ | $2.48 \times 10^4$ | $6.59 \times 10^3$ |
|                             | 4               | $2.18 \times 10^6$ | $5.07 \times 10^4$ | $1.11 \times 10^4$ |
|                             | 5               | $1.04 \times 10^6$ | $1.39 \times 10^4$ | $6.90 \times 10^3$ |
|                             | 6               | $5.76 \times 10^5$ | $7.07 \times 10^3$ | $5.88 \times 10^3$ |
|                             | 7               | $8.34 \times 10^5$ | $1.69 \times 10^4$ | $3.70 \times 10^3$ |
|                             | 8               | $2.41 \times 10^6$ | $2.37 \times 10^4$ | $7.12 \times 10^3$ |
|                             | 9               | $1.25 \times 10^6$ | $4.16 \times 10^4$ | $9.81 \times 10^3$ |
|                             | 10              | $6.28 \times 10^4$ | $1.70 \times 10^4$ | $9.27 \times 10^3$ |
|                             | 11              | $4.93 \times 10^5$ | $9.96 \times 10^3$ | $6.59 \times 10^3$ |
| WWTP B                      | 1               | $1.44 \times 10^6$ | $7.15 \times 10^3$ | $5.90 \times 10^3$ |
|                             | 2               | $1.56 \times 10^6$ | $7.67 \times 10^3$ | $4.95 \times 10^3$ |
|                             | 3               | $1.69 \times 10^6$ | $9.73 \times 10^3$ | $5.76 \times 10^3$ |
|                             | 4               | $4.03 \times 10^5$ | $5.66 \times 10^3$ | $5.51 \times 10^3$ |
|                             | 5               | $2.75 \times 10^4$ | $1.11 \times 10^4$ | $7.44 \times 10^3$ |
|                             | 6               | $1.18 \times 10^5$ | $3.49 \times 10^3$ | $6.88 \times 10^3$ |
|                             | 7               | $9.04 \times 10^5$ | $2.40 \times 10^3$ | $7.60 \times 10^3$ |
|                             | 8               | $1.06 \times 10^6$ | $6.94 \times 10^3$ | $3.96 \times 10^3$ |
|                             | 9               | $4.05 \times 10^5$ | $2.50 \times 10^3$ | $4.04 \times 10^3$ |
|                             | 10              | $2.99 \times 10^5$ | $2.11 \times 10^3$ | $2.62 \times 10^3$ |
|                             | 11              | $7.30 \times 10^5$ | $3.42 \times 10^3$ | $5.61 \times 10^3$ |
| WWTP C                      | 1               | $1.78 \times 10^5$ | $1.53 \times 10^4$ | $3.61 \times 10^3$ |
|                             | 2               | $5.47 \times 10^4$ | $2.97 \times 10^3$ | $4.34 \times 10^3$ |
|                             | 3               | $4.19 \times 10^5$ | $1.71 \times 10^4$ | $8.05 \times 10^3$ |
|                             | 4               | $3.08 \times 10^5$ | $2.31 \times 10^4$ | $5.77 \times 10^3$ |
|                             | 5               | $2.43 \times 10^5$ | $3.92 \times 10^3$ | $5.07 \times 10^3$ |
|                             | 6               | $6.58 \times 10^5$ | $4.91 \times 10^3$ | $5.59 \times 10^3$ |
|                             | 7               | $1.04 \times 10^5$ | $7.25 \times 10^3$ | $3.55 \times 10^3$ |
|                             | 8               | $1.05 \times 10^5$ | $1.86 \times 10^4$ | $6.10 \times 10^3$ |
|                             | 9               | $8.03 \times 10^4$ | $2.72 \times 10^3$ | $5.41 \times 10^3$ |
|                             | 10              | $4.10 \times 10^4$ | $1.53 \times 10^4$ | $1.39 \times 10^4$ |
|                             | 11              | $8.17 \times 10^4$ | $2.93 \times 10^3$ | $4.97 \times 10^3$ |

95  
96  
97  
98  
99  
100  
101  
102  
103  
104

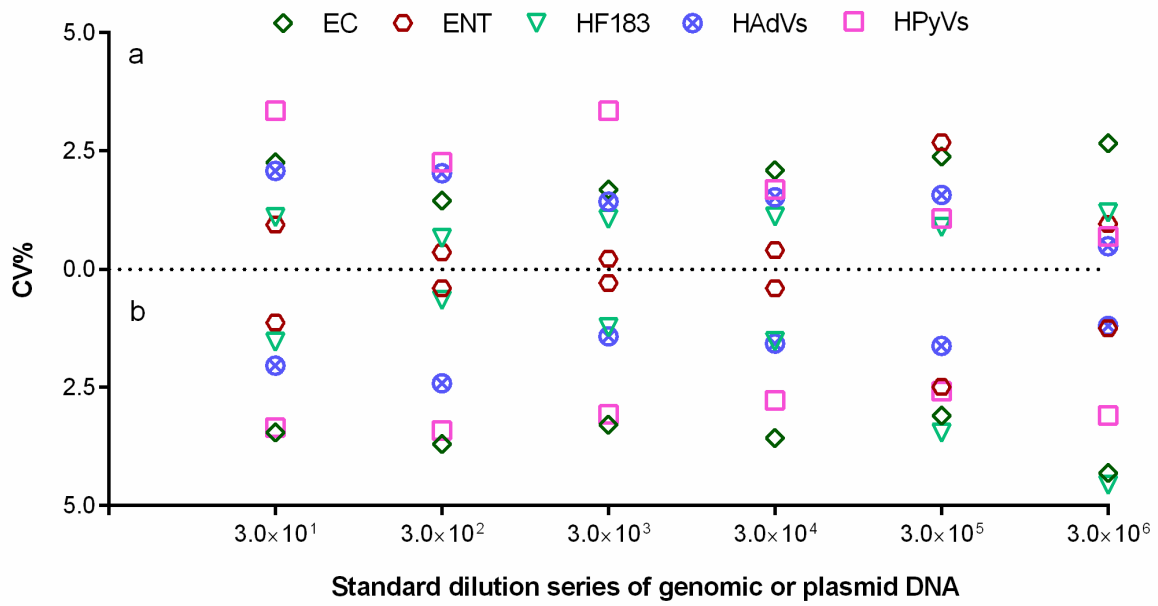

105  
106  
107  
108  
109  
110  
111  
112  
113  
114  
115  
116  
117

**Supplementary Fig. S1:** The mean (a) intra-assay repeatability and (b) inter-assay reproducibility coefficient of variation (CV) for the EC (*E. coli*), ENT (*Enterococcus* spp.), sewage-associated *Bacteroides* HF183 (HF183), HAdVs (human adenoviruses) and HPyVs (human polyomaviruses) qPCR assays within the range of  $3.0 \times 10^1$  to  $3.0 \times 10^6$  standard series

118  
119  
120  
121  
122  
123  
124  
125  
126

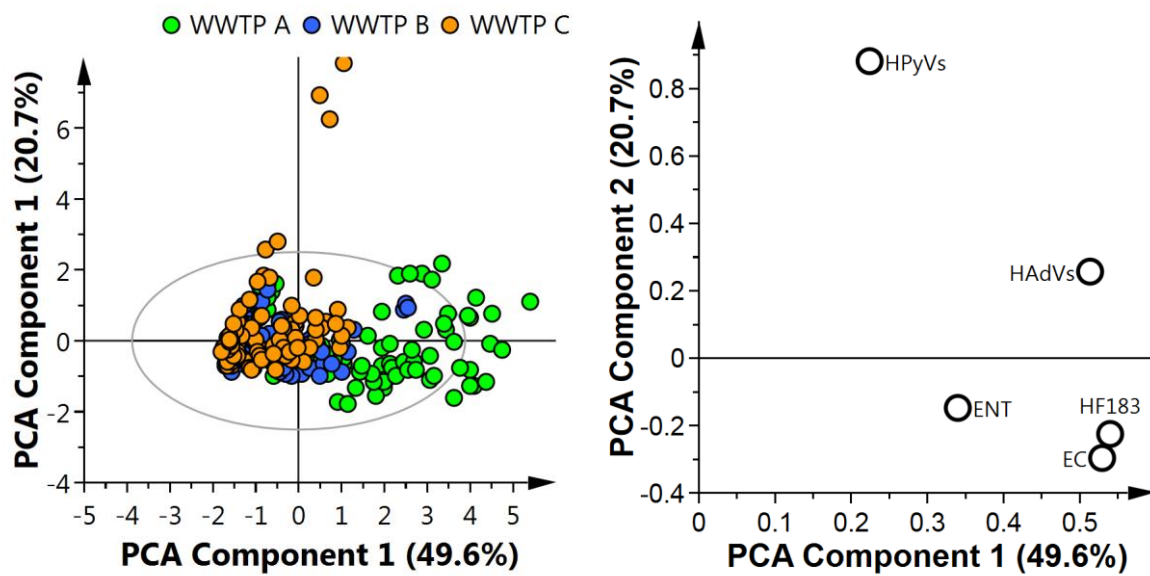

127  
128  
129  
130  
131  
132  
133  
134  
135  
136  
137  
138  
139  
140

**Supplementary Fig. S2:** Principal Component Analysis (PCA) of the concentrations (gene copies per mL) of *Escherichia coli* (EC), *Enterococcus* spp. (ENT), *Bacteroides* HF183 (HF183), human adenoviruses (HAdVs), and human polyomaviruses (HPyVs) in raw wastewater samples collected from three WWTPs (A, B and C) in Australia. Figure (a) represents the PCA score scattered plot and Figure (b) represents PCA loading scatter plot.

141  
142  
143  
144  
145  
146  
147  
148  
149  
150  
151  
152  
153  
154  
155  
156  
157  
158  
159  
160  
161  
162  
163  
164  
165  
166  
167  
168  
169  
170  
171  
172

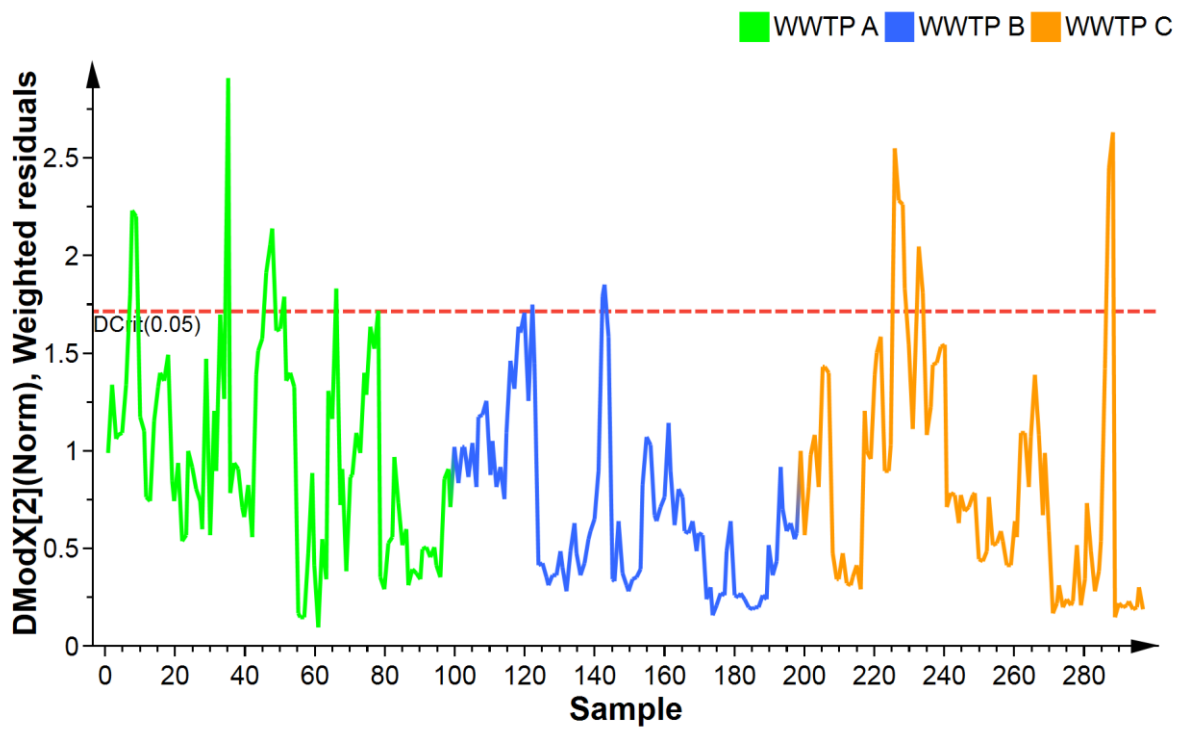

**Supplementary Fig. S3:** Distance of observation plot of the PCA data



173  
174  
175  
176  
177

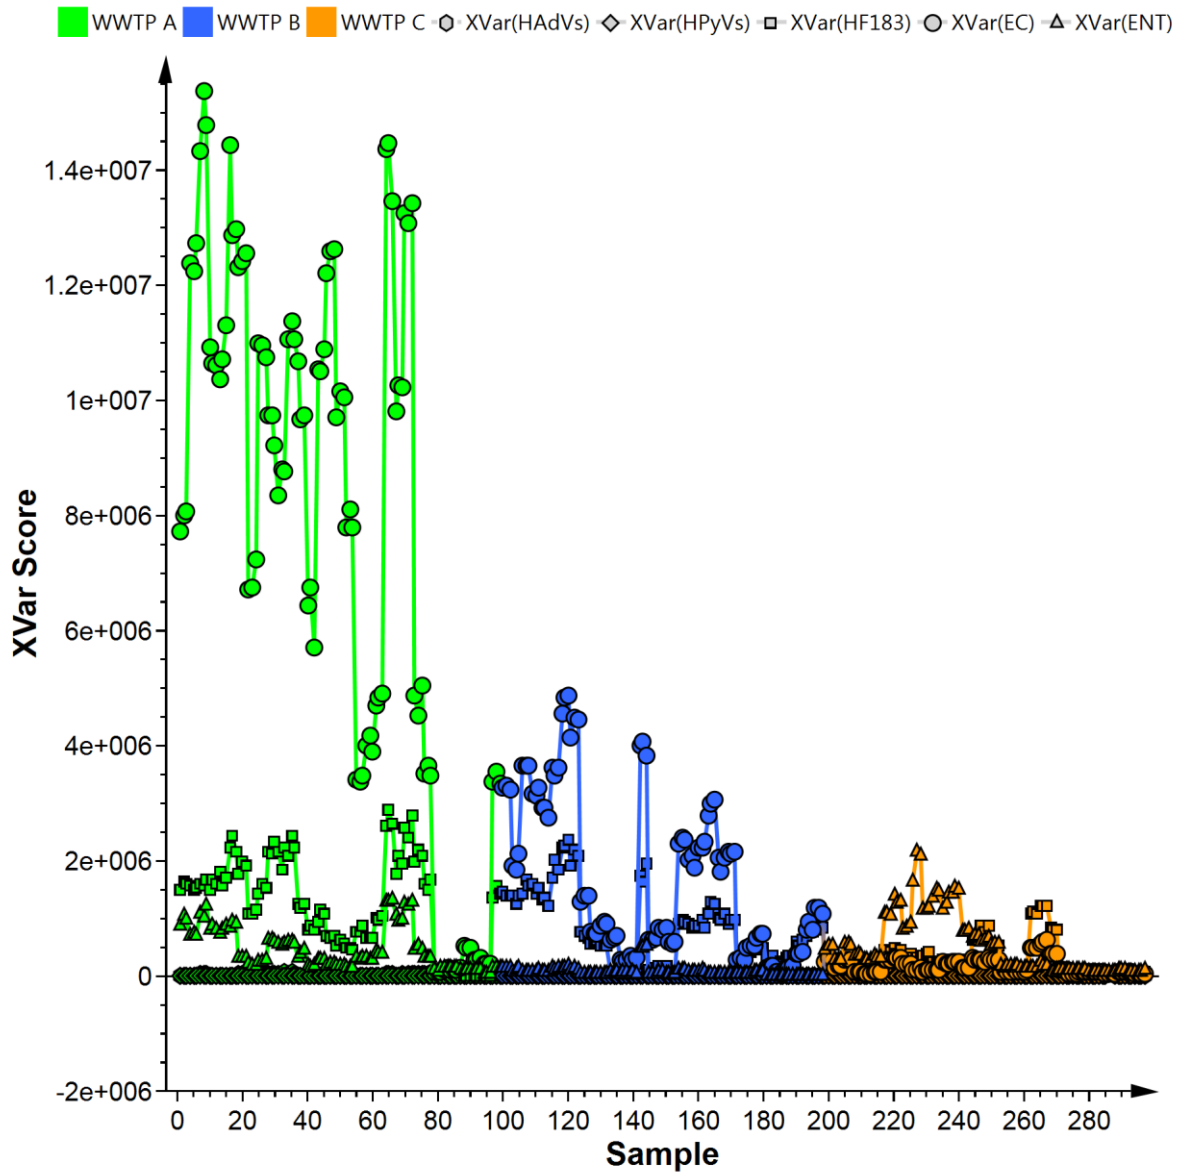

178  
179  
180  
181  
182  
183  
184  
185

**Supplementary Fig. S4:** Variable contribution plot for concentrations (gene copies per mL) of *Escherichia coli* (EC), *Enterococcus* spp. (ENT), *Bacteroides* HF183 (HF183), human adenoviruses (HAdVs), and human polyomaviruses (HPyVs) across the three WWTPs (A, B and C)

186

187 **REFERENCES**

188 1. **Bernhard AE, Field, K.G.** 2000. Identification of nonpoint sources of fecal pollution in coastal waters by using  
189 host-specific 16S ribosomal DNA genetic markers from fecal anaerobes. *Appl. Environ. Microbiol* **66**: 1587–1594.  
190 2. **Chern EC, Siefiring S, Paar J, Doolittle M, Haugland RA.** 2011. Comparison of quantitative PCR assays for  
191 *Escherichia coli* targeting ribosomal RNA and single copy genes. *Lett. Appl. Microbiol.* **52**: 298–306.  
192 3. **Haugland A, Siefiring SC, Wymer LJ, Brenner KP, Dufour AP.** 2005. Comparison of *Enterococcus*  
193 measurements in freshwater at two recreational beaches by quantitative polymerase chain reaction and  
194 membrane filter culture analysis. *Water Res.* **39**:559–568.  
195 4. **Heim A, Ebnet C, Harste G, Pring-Åkerblom.** 2003. Rapid and quantitative detection of human adenovirus DNA  
196 by real-time PCR. *J. Med. Virol.* **70**: 228-239.  
197 5. **McQuaig SM, Scott TM, Lukasik JO, Paul JH, Harwood VJ.** 2009. Quantification of human polyomaviruses JC  
198 virus and BK virus by TaqMan quantitative PCR and comparison to other water quality indicators in water and  
199 fecal samples. *Appl. Environ. Microbiol.* **75**: 3379-3388.  
200 6. **Seurinck S, Defoirdt T, Verstraete W, Siciliano SD.** 2005. Detection and quantification of the human-specific  
201 HF183 *Bacteroides* 16S rRNA genetic markers with real-time PCR for assessment of human fecal pollution in  
202 freshwater. *Environ. Microbiol.* **7**: 249–259.

203

204

205
